# Supplementary material
Source: publisher site journal article supplement (https://www.dovepress.com/article/270557)
Supplement: Supplementary file 1 [file get_supplementary_file.php]

**Supplementary Materials:**

**Supplementary Figure 1: Study Design and Inclusion/Exclusion Criteria**

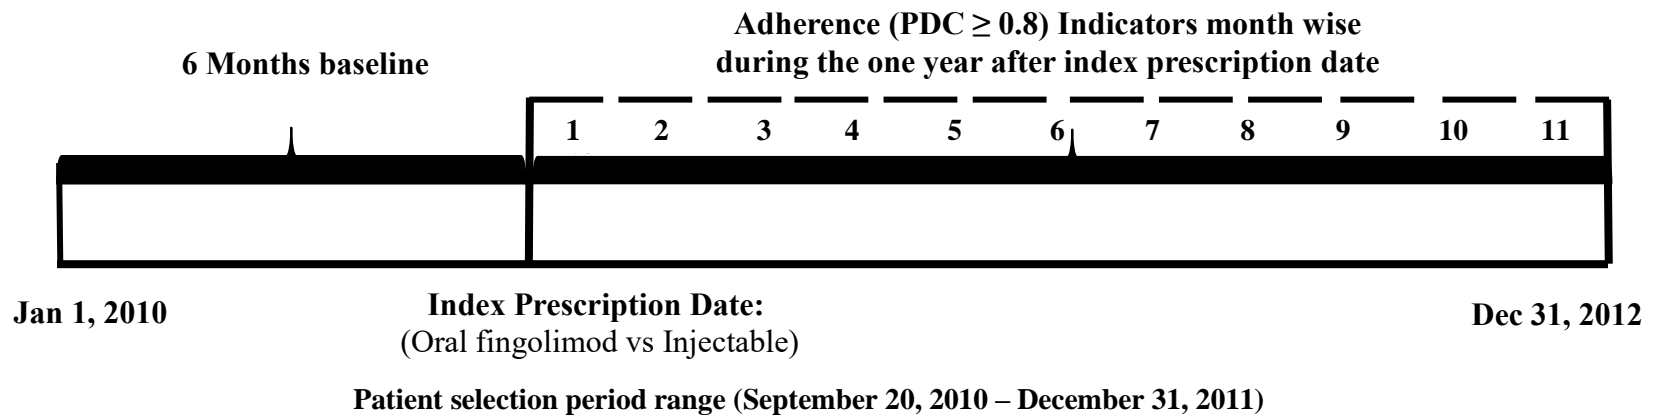

**Inclusion Criteria:**

- (i) Age  $\geq 18$  Years,
- (ii) MS diagnosed patients with Index DMA Prescription, and
- (iii) Continuous Eligibility during baseline 6 and follow-up 12 months

**Exclusion Criteria:**

- (i) Combination medication users, and
- (ii) Teriflunomide users

PDC=Proportion of days covered

**Supplementary Figure 2: Adherence Trajectories with 4 and 5 groups, and for oral and injectable DMA users separately**

**a) Four Groups**

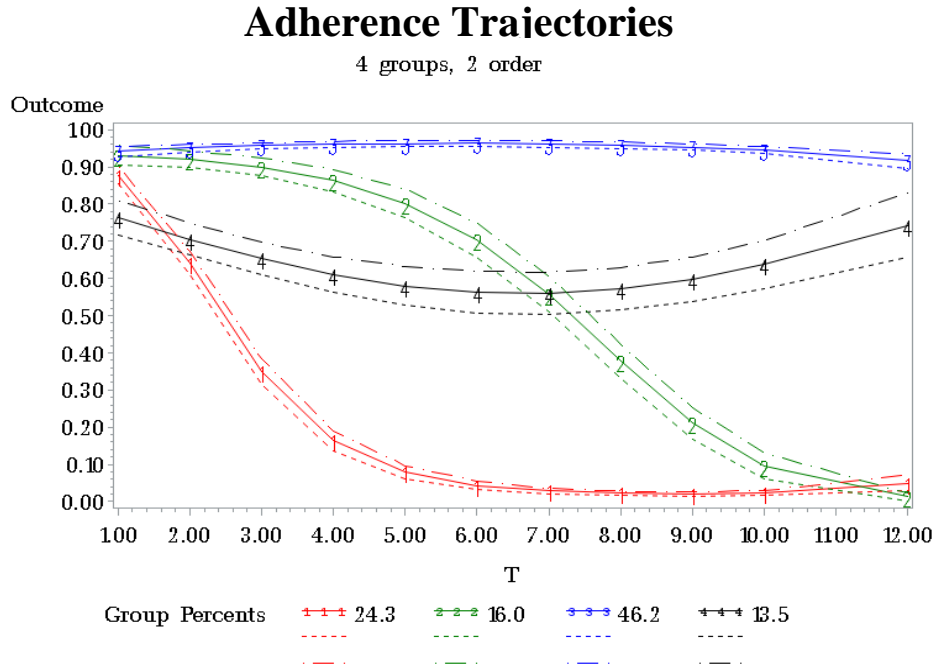

**b) Five Groups**

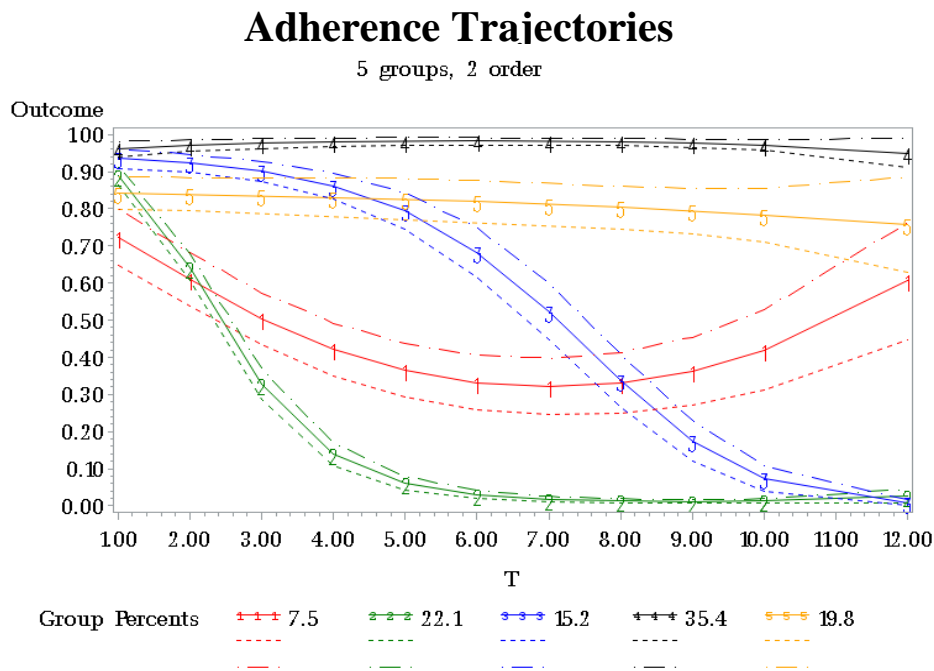

### C. Trajectories for Oral and Injectable DMA Users Separately

**Oral DMA users**  
Adherence Trajectories  
3 groups, 2 order

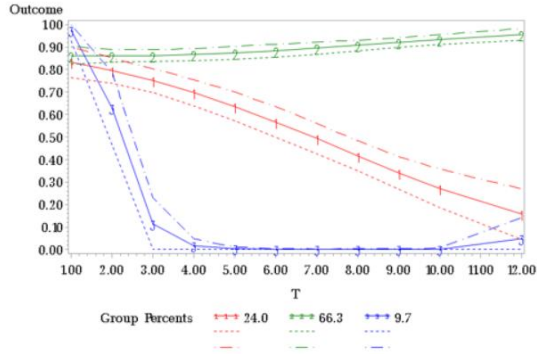

**Injectable DMA users**  
Adherence Trajectories  
3 groups, 2 order

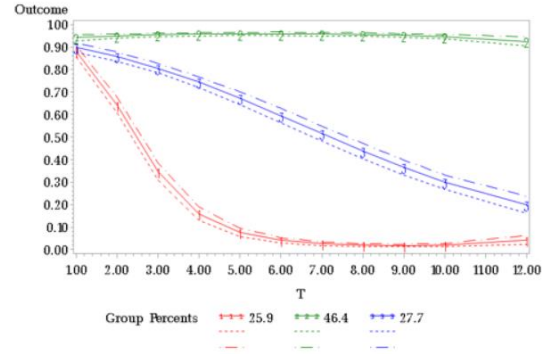

**Supplementary Figure 3: Standardized Differences between Covariates of Oral Fingolimod and Injectable DMA Users Before and After IPTW Matching**

**Standardized differences before and after IPTW**  
**Threshold: -0.25 to 0.25**

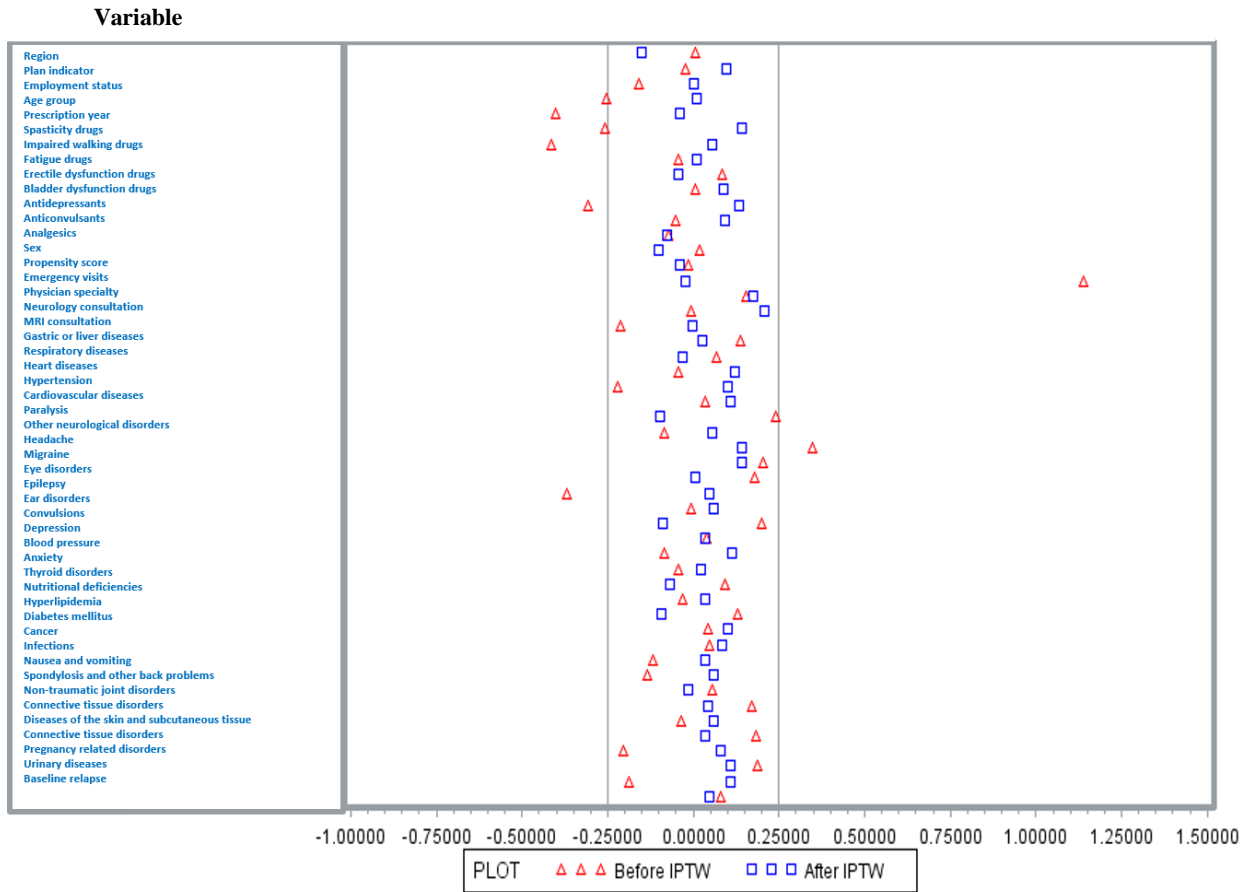

**Abbreviations:** MS – Multiple Sclerosis, DMA – Disease Modifying Agent, IPTW - inverse probability treatment weights
